# Supplementary material
Source: PubMed Central journal article supplement (PMC3005502)
Supplement: SD1.pdf [file SD1.pdf]

SUPPLEMENTAL APPENDIX

SUPPLEMENTAL TABLE 1  
Characteristics of institutional amplifiers in tuberculosis epidemics\*

| Region                                         | Type of amplifier       | Method of amplifier exposure                                                                               | Typical durations of amplifier exposure                                                                                | Method of amplification                                        |
|------------------------------------------------|-------------------------|------------------------------------------------------------------------------------------------------------|------------------------------------------------------------------------------------------------------------------------|----------------------------------------------------------------|
| Eastern Europe and Former Soviet Union         | Prison wards            | High incarceration rates <sup>9</sup>                                                                      | 5.2 years on average <sup>10</sup>                                                                                     | Release from prison <sup>11</sup>                              |
| Southern Africa                                | Mines                   | Mines are the region's largest employer, employing migrant workers <sup>12</sup>                           | Cyclic, 9 months/year on average <sup>13</sup>                                                                         | Migrant labor from mines back to rural homelands <sup>13</sup> |
| South Asia, Latin America, and Southern Africa | Communal hospital wards | Admission to group wards (multi-person rooms) in crowded hospitals for therapy initiation <sup>14-16</sup> | Among tuberculosis patients, days to weeks for therapy initiation before outpatient continuation therapy <sup>17</sup> | Discharge to community <sup>14</sup>                           |

\*Numbers in parentheses are references.

MODEL EQUATIONS

We subdivided the population into civilian and amplifier populations, where the former was further organized into persons at risk (subscript  $i$ ) and persons not at risk for amplification (subscript  $j$ ). In the following equations, superscript  $a$  refers to persons in the amplifier, and subscripts  $s$  and  $r$  refer to non-multidrug-resistant tuberculosis (non-MDR TB) and MDR TB strains, respectively. The parameter definitions are provided in Supplemental Appendix, Table 1, and the state variables are susceptible persons ( $S$ ), latently-infected persons ( $L$ ), persons with active TB ( $T$ ), those persons detected and in therapy ( $D$ ), and those who have failed therapy ( $F$ ). In simulations involving human immunodeficiency virus (HIV), the weighted average parameter values among HIV-negative and HIV-positive persons (Supplemental Appendix, Table 2) were used as the parameter values in the equations, where the HIV prevalence was used as the weight.

$$\begin{aligned}
 dS_i^a / dt &= \varepsilon S_i - (\lambda_s^a + \lambda_r^a + \delta + \mu_i) S_i^a \\
 dS_i / dt &= \gamma b + \delta S_i^a - (\lambda_s + \lambda_r + \varepsilon + \mu_i^a) S_i \\
 dS_j / dt &= (1 - \gamma) b - (\lambda_s + \lambda_r + \mu_j) S_j \\
 dL_{is}^a / dt &= (1 - p_i) \lambda_s^a (S_i^a + x_i (L_{is}^a + L_{ir}^a)) + n_i T_{is}^a + r k_s^a D_{is}^a + \varepsilon L_{is}^a \\
 &\quad - (x_i (\lambda_s^a + \lambda_r^a) + v_i + \delta + \mu_i) L_{is}^a \\
 dL_{ir}^a / dt &= (1 - p_i) \lambda_r^a (S_i^a + x_i (L_{is}^a + L_{ir}^a)) + n_i T_{ir}^a + r k_{ra} D_{ir}^a + \varepsilon L_{ir}^a \\
 &\quad - (x_i (\lambda_s^a + \lambda_r^a) + v_i + \delta + \mu_i) L_{ir}^a \\
 dL_{is} / dt &= (1 - p_i) \lambda_s (S_i + x_i (L_{is} + L_{ir})) + n_i T_{is} + r k_s D_{is} + \delta L_{is}^a \\
 &\quad - (x_i (\lambda_s + \lambda_r) + v_i + \varepsilon + \mu_i) L_{is} \\
 dL_{ir} / dt &= (1 - p_i) \lambda_r (S_i + x_i (L_{is} + L_{ir})) + n_i T_{ir} + r k_r D_{ir} + \delta L_{ir}^a \\
 &\quad - (x_i (\lambda_s + \lambda_r) + v_i + \varepsilon + \mu_i) L_{ir}
 \end{aligned}$$

$$\begin{aligned}
 dL_{js} / dt &= (1 - p_j) \lambda_s (S_j + x_j (L_{js} + L_{jr})) + n_j T_{js} + r k_s D_{js} \\
 &\quad - (x_j (\lambda_s + \lambda_r) + v_j + \lambda_j) L_{js} \\
 dL_{jr} / dt &= (1 - p_j) \lambda_r (S_j + x_j (L_{js} + L_{jr})) + n_j T_{jr} + r k_r D_{jr} \\
 &\quad - (x_j (\lambda_s + \lambda_r) + v_j + \lambda_j) L_{jr} \\
 dT_{is}^a / dt &= p_i \lambda_s^a (S_i^a + x_i (L_{is}^a + L_{ir}^a)) + v_i L_{is}^a + \varepsilon T_i^s \\
 &\quad - (d^a + n_i + \delta + \mu_i + \mu_{ti}) T_{is}^a \\
 dT_{ir}^a / dt &= p_i \lambda_r^a (S_i^a + x_i (L_{is}^a + L_{ir}^a)) + v_i L_{ir}^a + \delta T_i^r \\
 &\quad - (d^a + n_i + \varepsilon + \mu_i + \mu_{ti}) T_{ir}^a \\
 dT_{ir} / dt &= p_i \lambda_r (S_i + x_i (L_{is} + L_{ir})) + v_i L_{ir} + \delta T_{ir}^a \\
 &\quad - (d + n_i + \varepsilon + \mu_i + \mu_{ti}) T_{ir} \\
 dT_{js} / dt &= p_j \lambda_s (S_j + x_j (L_{js} + L_{jr})) + v_j L_{js} - (d + n_j + \mu_j + \mu_{ij}) T_{js} \\
 dT_{jr} / dt &= p_j \lambda_r (S_j + x_j (L_{js} + L_{jr})) + v_j L_{jr} - (d + n_j + \mu_j + \mu_{ij}) T_{jr} \\
 dD_{is}^a / dt &= d^a (T_{is}^a + F_{is}^a) + \theta \varepsilon D_{is} - (r + \delta + \mu_i + \mu_{ti}) D_{is}^a \\
 dD_{ir}^a / dt &= d^a (T_{ir}^a + F_{ir}^a) + \theta \varepsilon D_{ir} - (r + \delta + \mu_i + \mu_{ti}) D_{ir}^a \\
 dD_{is} / dt &= d (T_{is} + F_{is}) + \omega \delta D_{is}^a - (r + \varepsilon + \mu_i + \mu_{ti}) D_{is} \\
 dD_{ir} / dt &= d (T_{ir} + F_{ir}) + \omega \delta D_{ir}^a - (r + \varepsilon + \mu_i + \mu_{ti}) D_{ir} \\
 dD_{js} / dt &= d (T_{js} + F_{js}) - (r + \mu_j + \mu_{ij}) D_{js} \\
 dD_{jr} / dt &= d (T_{jr} + F_{jr}) - (r + \mu_j + \mu_{ij}) D_{jr} \\
 dF_{is}^a / dt &= (1 - \alpha) (r (1 - k_{sa}) D_{is}^a + (1 - \theta) \varepsilon D_{is}) + \varepsilon F_{is} \\
 &\quad - (d_a + \delta + \mu_i + \mu_{fi}) F_{is}^a
 \end{aligned}$$

$$dF_{ir}^a / dt = \alpha \left( r(1-k_s)D_{is}^a + (1-\theta)\varepsilon D_{is} \right) + r(1-k_r)D_{ir}^a + (1-\theta)\varepsilon D_{ir} + \varepsilon F_{ir} - (d_a + \delta + \mu_i + \mu_{fi})F_{ir}^a$$

$$dF_{is}^a / dt = (1-\alpha) \left( r(1-k_s)D_{is} + (1-\omega)\delta D_{is}^a \right) + \delta F_{is}^a - (d + \varepsilon + \mu_i + \mu_{fi})F_{is}^a$$

$$dF_{ir} / dt = \alpha \left( r(1-k_s)D_{is} + (1-\omega)\delta D_{is}^a \right) + r(1-k_r)D_{ir} + (1-\omega)\delta D_{ir}^a + \delta F_{ir}^a - (d + \varepsilon + \mu_i + \mu_{fi})F_{ir}$$

$$dF_{js} / dt = (1-\alpha)r(1-k_s)D_{js} - (d + \mu_j + \mu_{ff})F_{js}$$

The forces of infection in either environment, for both non-MDR and MDR TB strains, are as follows:

$$\lambda_s = \beta f_i (T_{is} + T_{js} + D_{is} + D_{js} + z(F_{is} + F_{js})) / N_c$$

$$\lambda_r = \varphi \beta f_i (T_{ir} + T_{jr} + D_{ir} + D_{jr} + z(F_{ir} + F_{jr})) / N_c$$

$$\lambda_s^a = \kappa q f_j (T_{is}^a + D_{is}^a + z F_{is}^a)$$

$$\lambda_r^a = \varphi \kappa q f_j (T_{ir}^a + D_{ir}^a + z F_{ir}^a)$$

SUPPLEMENTAL TABLE 2

Natural history and TB control parameters used for simulation\*

| Parameter        | Definition                                                                                                     | HIV-negative value (range)                                                  | HIV-positive value (range) | Sources  |
|------------------|----------------------------------------------------------------------------------------------------------------|-----------------------------------------------------------------------------|----------------------------|----------|
| $b$              | Population birth rate                                                                                          | Set to maintain constant population                                         |                            | –        |
| $\gamma$         | Proportion of population at risk for amplifier entry                                                           | Varied in simulation                                                        |                            | –        |
| $\varepsilon$    | Rate of entry to amplifier among those at risk for entry                                                       | Varied in simulation                                                        |                            | –        |
| $\delta$         | Rate of exit from amplifier                                                                                    | Varied in simulation; inverse length of stay in amplifier                   |                            | –        |
| $\beta$          | Per capita transmission rate                                                                                   | 9.8 (7.0–12.6)                                                              |                            | (1)      |
| $f$              | Fraction of active TB cases who are infectious                                                                 | 0.65 (0.5–0.65)                                                             | 0.3 (0.19–0.4)             | (2)      |
| $z$              | Relative proportion of treatment failures who are infectious vs. active cases                                  | 0.25 (0–0.5)                                                                |                            | (1)      |
| $\mu$            | Background (non-TB) mortality rate                                                                             | 0.015 (0.01–0.04)                                                           | 0.098 (0.093–0.103)        | (2, 18)  |
| $d$              | Detection and treatment initiation rate                                                                        | 83 (40–172) weeks                                                           | 18 (9–30) weeks            | (19)     |
| $p$              | Proportion of newly infected persons experiencing primary progressive disease                                  | 0.14 (0.08–0.25)                                                            | 0.67 (0.36–0.8)            | (2)      |
| $k$              | Proportion of treated cases cured                                                                              | 0.7 (0.6–0.85); $\times 0.6$ ( $\times 0.5$ – $\times 1$ ) lower for MDR TB |                            | (6)      |
| $n$              | Rate of natural self-cure                                                                                      | 0.2 (0.15–0.25)                                                             | 0.1 (0–0.15)               | (2)      |
| $r$              | 1/culture conversion time                                                                                      | 34 (8–181) days <sup>-1</sup>                                               |                            | (20, 21) |
| $v$              | Reactivation rate from latency                                                                                 | $1.13 \times 10^{-4}$ ( $10^{-4}$ – $3 \times 10^{-4}$ )                    | 0.17 (0.04–0.2)            | (2)      |
| $x$              | Proportion of latently-infected persons who are susceptible to primary progressive disease upon re-infection   | 0.35 (0.1–0.6)                                                              | 0.75 (0.5–1.0)             | (2)      |
| $\mu_i$          | Mortality rate caused by TB (multiplied by 0.5 (range 0–1) for treatment failures, $\mu_{fi}$ )                | 0.3 (0.2–0.4)                                                               | 1.0 (0.75–1.0)             | (1, 2)   |
| $\alpha$         | proportion of patients failing therapy who acquire resistance                                                  | 0.07 (0.008–0.18)                                                           |                            | (6)      |
| $\varphi$        | Relative transmission fitness of MDR TB strains                                                                | 0.5 (0.16–1.2)                                                              |                            | (6, 7)   |
| $\kappa$         | Ratio of pulmonary to room ventilation rate                                                                    | 0.48 (0.4–0.6) m <sup>3</sup> /hour/520 (330–1,209) m <sup>3</sup> /hour    |                            | (5, 16)  |
| $\theta, \omega$ | Proportion not lost to treatment follow-up at entry to ( $\theta$ ), or upon exit from ( $\omega$ ), amplifier | Varied in simulations                                                       |                            | –        |

\*TB = tuberculosis; HIV = human immunodeficiency virus; MDR = multidrug resistant.

SUPPLEMENTAL TABLE 3

Sensitivity analysis\*

| Parameter | Definition                                                                                                   | % Change in TB prevalence with 1% change in HIV-negative value | % Change in TB prevalence with 1% change in HIV-positive value |
|-----------|--------------------------------------------------------------------------------------------------------------|----------------------------------------------------------------|----------------------------------------------------------------|
| $\beta$   | Per capita transmission rate                                                                                 | 1.8053                                                         | 1.7719                                                         |
| $f$       | Fraction of active TB cases who are infectious                                                               | 1.8053                                                         | 0.0084                                                         |
| $z$       | Relative proportion of treatment failures who are infectious vs. active cases                                | 0.0260                                                         | 0.0457                                                         |
| $\mu$     | Background (non-TB) mortality rate                                                                           | –1.0432                                                        | 0.0017                                                         |
| $d$       | Detection and treatment initiation rate                                                                      | 1.8233                                                         | –0.0106                                                        |
| $p$       | Proportion of newly infected persons experiencing primary progressive disease                                | –0.5903                                                        | 0.0876                                                         |
| $k$       | Proportion of treated cases cured                                                                            | –0.9715                                                        |                                                                |
| $n$       | Rate of natural self-cure                                                                                    | –0.5903                                                        | –0.0030                                                        |
| $r$       | 1/culture conversion time                                                                                    | –0.0948                                                        |                                                                |
| $v$       | Reactivation rate from latency                                                                               | 0.0532                                                         | 0.8302                                                         |
| $x$       | Proportion of latently-infected persons who are susceptible to primary progressive disease upon re-infection | 0.6105                                                         | 0.0131                                                         |
| $\mu_i$   | Mortality rate caused by TB (multiplied by 0.5 (range 0–1) for treatment failures, $\mu_{fi}$ )              | –0.9401                                                        | –0.0318                                                        |
| $\alpha$  | Proportion of patients failing therapy who acquire resistance                                                |                                                                | $-5.9984 \times 10^{-4}$                                       |
| $\varphi$ | Relative transmission fitness of MDR TB strains                                                              |                                                                | 0.0030                                                         |
| $\kappa$  | Ratio of pulmonary to room ventilation rate                                                                  |                                                                | 0.0420                                                         |

\*Percentage change in overall population TB prevalence upon a 1% increase in the listed parameter while all other parameters are held at their modal values from Table 2 and the amplifier parameters listed in the main manuscript for Russian prisons, along with 1% general population HIV prevalence. The figure excludes those parameters for which a univariate sensitivity analysis is already presented in the main manuscript figures, i.e., proportion of population at risk of amplifier entry. TB = tuberculosis; HIV = human immunodeficiency virus; MDR = multidrug resistant.

## REFERENCES

1. Dye C, Williams BG, 2000. Criteria for the control of drug-resistant tuberculosis. *Proc Natl Acad Sci USA* 97: 8180–8185.
2. Dye C, Garnett GP, Sleeman K, Williams BG, 1998. Prospects for worldwide tuberculosis control under the WHO DOTS strategy. Directly observed short-course therapy. *Lancet* 352: 1886–1891.
3. Wells WF, 1955. *Airborne Contagion and Air Hygiene: An Ecological Study of Droplet Infections*. Cambridge, MA: Harvard University Press, 112–129.
4. Riley RL, Mills SC, O'Grady F, Sultan LU, Wittstadt F, Shivpuri DN, 1962. Infectiousness of air from a tuberculosis ward. *Am Rev Respir Dis* 85: 511–525.
5. Noakes CJ, Beggs CB, Sleigh PA, Kerr KG, 2006. Modelling the transmission of airborne infections in enclosed spaces. *Epidemiol Infect* 134: 1082–1091.
6. Dye C, Espinal MA, 2001. Will tuberculosis become resistant to all antibiotics? *Proc Biol Sci* 268: 45–52.
7. Gagneux S, Long CD, Small PM, Van T, Schoolnik GK, Bohannon BJ, 2006. The competitive cost of antibiotic resistance in *Mycobacterium tuberculosis*. *Science* 312: 1944–1946.
8. Blower SM, Dowlatabadi H, 1994. Sensitivity and uncertainty analysis of complex models of disease transmission. *Int Stat Rev* 2: 229–243.
9. Stuckler D, Basu S, McKee M, King L, 2008. Mass incarceration can explain population increases in TB and multidrug-resistant TB in European and central Asian countries. *Proc Natl Acad Sci U S A* 105: 13280–13285.
10. Shin G, Khoshnood K, 2004. The impact of prison amnesties on tuberculosis control in Russia. *Harvard Health Pol Rev* 5: 20–35.
11. Jones TF, Woodley CL, Fountain FF, Schaffner W, 2003. Increased incidence of the outbreak strain of *Mycobacterium tuberculosis* in the surrounding community after an outbreak in a jail. *South Med J* 96: 155–157.
12. Williams BG, Campbell CM, Mqoqi NP, Kleinschmidt I, 1998. Occupational health, occupational illness: tuberculosis, silicosis and HIV on South African Mines. Banks D, Parker J, eds. *Occupational Lung Disease: An International Perspective*. London: Chapman and Hall, 95–103.
13. Aids and Rights Alliance, 2008. *The Mining Sector, Tuberculosis and Migrant Labour in Southern Africa*. Durban, South Africa: ARASA.
14. Basu S, Friedland GH, Medlock J, Andrews JR, Shah NS, Gandhi NR, Moll A, Moodley P, Sturm AW, Galvani AP, 2009. Averting epidemics of extensively drug-resistant tuberculosis. *Proc Natl Acad Sci U S A* 106: 7672–7677.
15. Wilkinson D, Crump J, Pillay M, Sturm AW, 1997. Nosocomial transmission of tuberculosis in Africa documented by restriction fragment length polymorphism. *Trans R Soc Trop Med Hyg* 91: 318–318.
16. Escombe AR, Oeser CC, Gilman RH, Navincopa M, Ticona E, Pan W, Martinez C, Chacaltana J, Rodriguez R, Moore DA, 2007. Natural ventilation for the prevention of airborne contagion. *PLoS Med* 4: e68.
17. Basu S, Andrews JR, Poolman EM, Gandhi NR, Shah NS, Moll A, Moodley P, Galvani AP, Friedland GH, 2007. Prevention of nosocomial transmission of extensively drug-resistant tuberculosis in rural South African district hospitals: an epidemiological modelling study. *Lancet* 370: 1500–1507.
18. Williams BG, Dye C, 2003. Antiretroviral drugs for tuberculosis control in the era of HIV/AIDS. *Science* 301: 1535–1537.
19. Corbett EL, Bandason T, Cheung YB, Munyati S, Godfrey-Fausset P, Hayes R, Chuchyard G, Butterworth A, Mason P, 2007. Epidemiology of tuberculosis in a high HIV prevalence population provided with enhanced diagnosis of symptomatic disease. *PLoS Med* 4: e22.
20. Fortun J, Martin-Davila P, Molina A, Navas E, Hermida JM, Cobo J, Gomez-Mampaso E, Moreno S, 2007. Sputum conversion among patients with pulmonary tuberculosis: are there implications for removal of respiratory isolation? *J Antimicrob Chemother* 59: 794–798.
21. Mitnick C, Bayona J, Palacios E, Shin S, Furin J, Alcantara F, Sanchez E, Sarria M, Becerra M, Fawzi MC, Kapiga S, Neuberger D, Maguire JH, Kim JY, Farmer P, 2003. Community-based therapy for multidrug-resistant tuberculosis in Lima, Peru. *N Engl J Med* 348: 119–128.
